# Supplementary material for: Highly stable, substrate-free, and flexible broadband halide perovskite paper photodetectors
Source: Royal Society of Chemistry journal article supplement (doi:10.1039/d2nr07008a), 2023-01-01
Supplement: d2nr07008a1.pdf [file d2nr07008a1.pdf]

## Supplementary Information

Lam-Gia-Hao Dao<sup>a</sup>, Chih-Hao Chiang<sup>a</sup>, Sumedh M. Shirsat<sup>a</sup>, Thi-Quynh-Hoa Nguyen<sup>a</sup>, Jitendra Singh<sup>a</sup>, Han-Song Wu<sup>a</sup>, Yu-Lun Liu<sup>a</sup>, and Meng-Lin Tsai<sup>\*a</sup>

*Department of Materials Science and Engineering, National Taiwan University of Science and Technology,  
Taipei 106335, Taiwan.*

*E-mail: [mltsai@mail.ntust.edu.tw](mailto:mltsai@mail.ntust.edu.tw)*

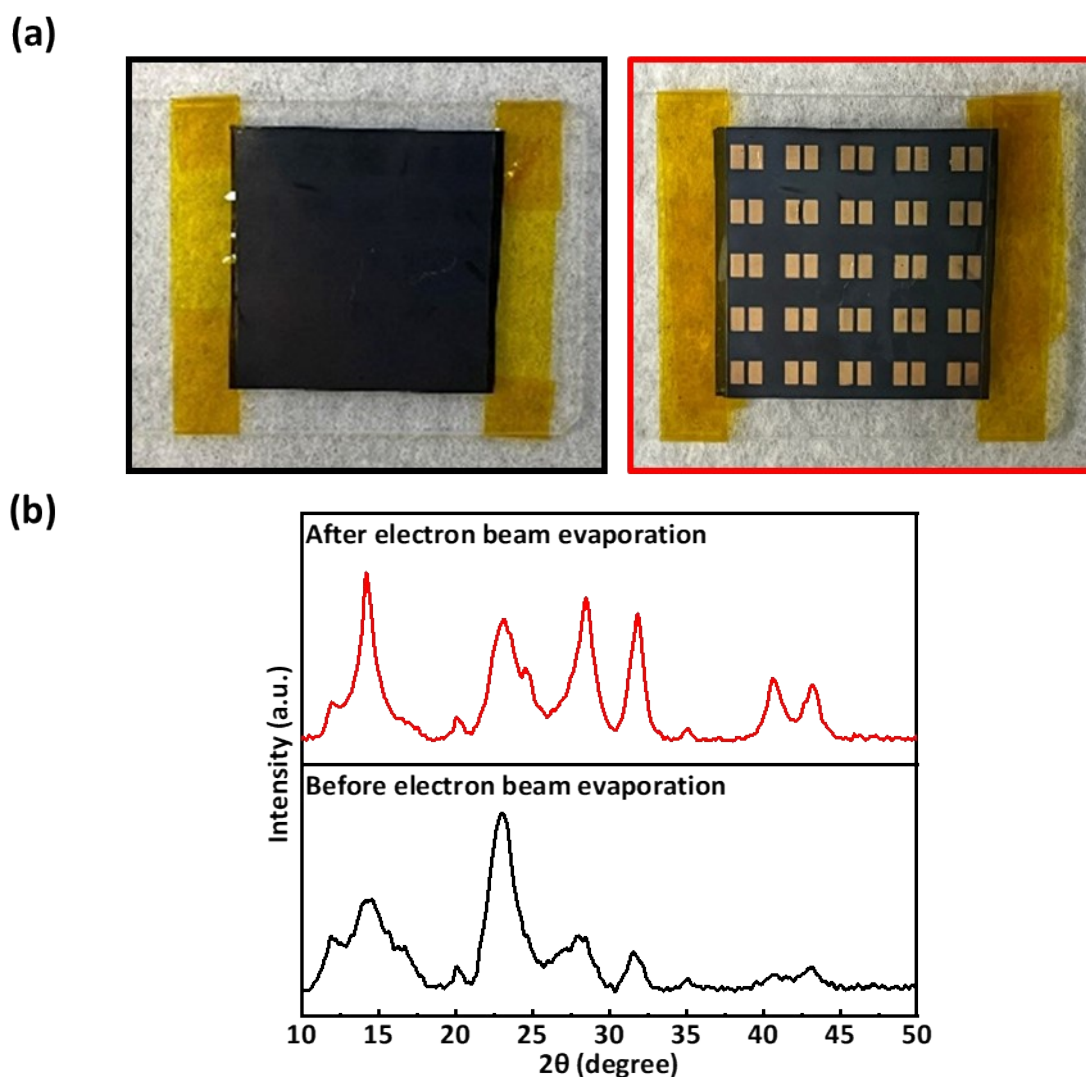

**Fig. S1** (a) Photographs of Zn-doped MA<sub>0.6</sub>FA<sub>0.4</sub>PbI<sub>3</sub>/CNC paper before and after electron-beam evaporation. (b) XRD patterns of Zn-doped MA<sub>0.6</sub>FA<sub>0.4</sub>PbI<sub>3</sub>/CNC paper before and after electron-beam evaporation.

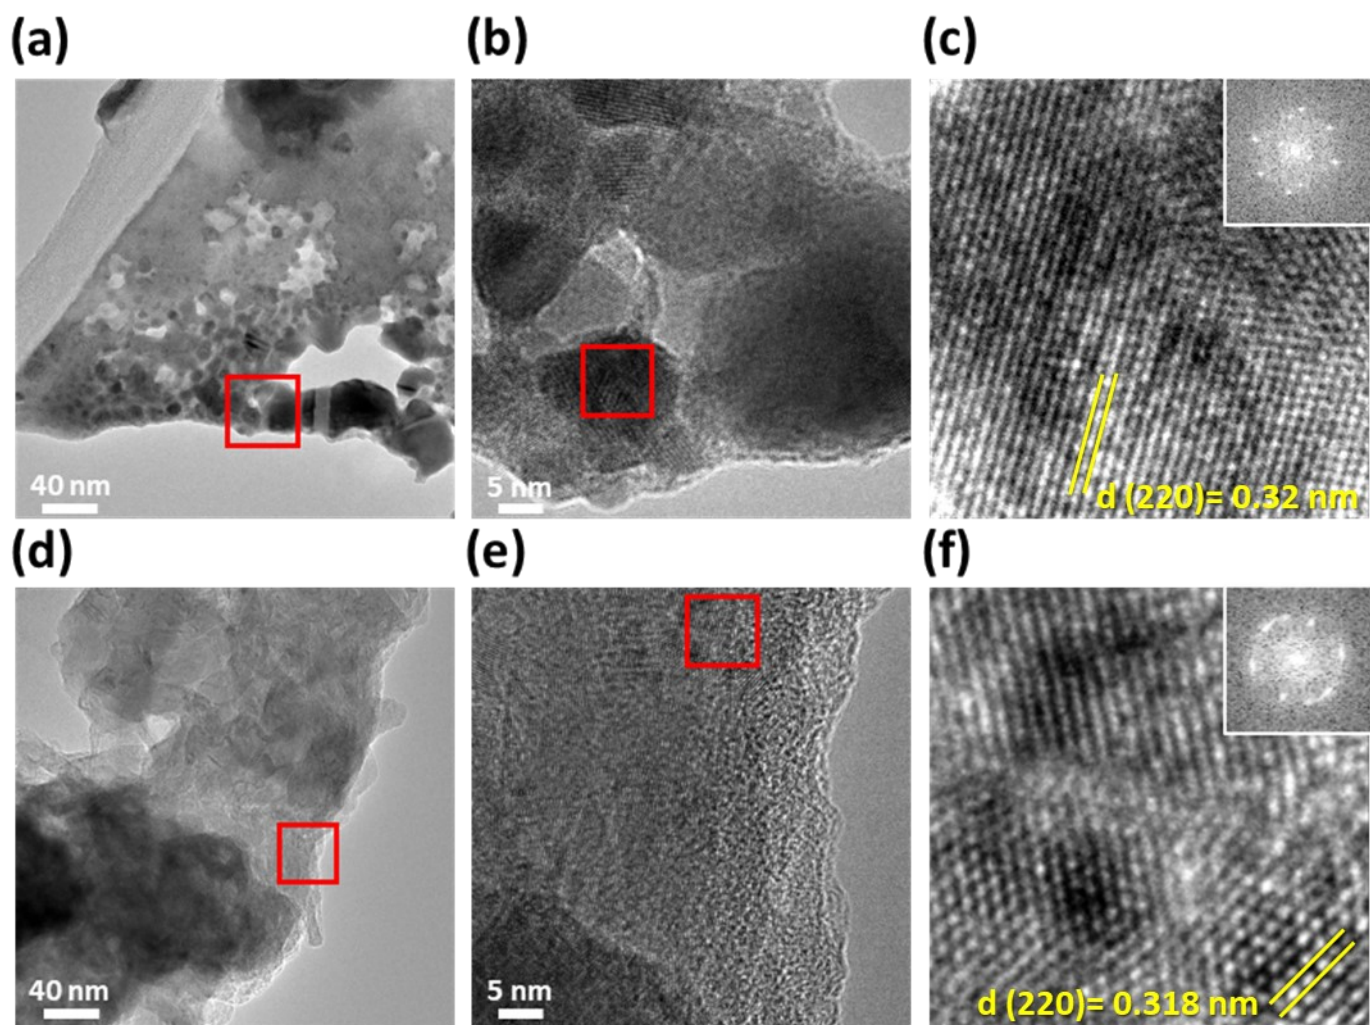

**Fig. S2** (a) TEM image of Zn-doped  $\text{MA}_{0.6}\text{FA}_{0.4}\text{PbI}_3$ . (b) The enlarge TEM image of red area in (a). (c) The HRTEM and FFT (inset) of Zn-doped  $\text{MA}_{0.6}\text{FA}_{0.4}\text{PbI}_3$ . (d) TEM image of the Zn-doped  $\text{MA}_{0.6}\text{FA}_{0.4}\text{PbI}_3/\text{CNC}$  paper. (e) The enlarge TEM image of red area in (d). (f) The HRTEM and FFT (inset) of the Zn-doped  $\text{MA}_{0.6}\text{FA}_{0.4}\text{PbI}_3/\text{CNC}$  paper.

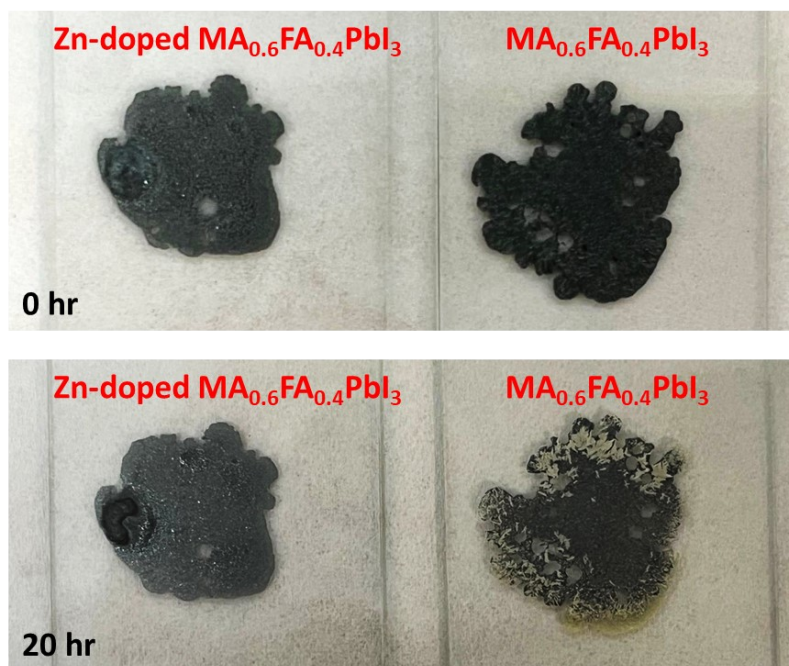

**Fig. S3** Photographs of Zn-doped MA<sub>0.6</sub>FA<sub>0.4</sub>PbI<sub>3</sub> and undoped MA<sub>0.6</sub>FA<sub>0.4</sub>PbI<sub>3</sub> film immediately after coating (0 hr) and under ambient condition after 20 hr.
